# Supplementary material for: Determination of UV-327 and its metabolites in human urine using dispersive liquid-liquid microextraction and gas chromatography-tandem mass spectrometry
Source: Royal Society of Chemistry journal article supplement (doi:10.1039/d1ay00932j), 2021-01-01

## Supplementary Information

### **Determination of UV-327 and its metabolites in human urine using dispersive liquid-liquid microextraction and gas chromatography-tandem mass spectrometry**

Corinna Fischer, Thomas Göen\*

Institute and Outpatient Clinic of Occupational, Social and Environmental Medicine,  
Friedrich-Alexander-Universität Erlangen-Nürnberg, Henkestraße 9–11, 91054 Erlangen, Germany

**\*Corresponding author:**

Thomas Göen  
Henkestraße 9–11  
91054 Erlangen  
Tel.: +49 9131 8526121  
thomas.goen@fau.de

**Fig. SI-1** Chemical structures of the internal standards **D<sub>20</sub>-UV-327** (2-(5-chloro-benzotriazol-2-yl)-4,6-di-(tert-1,1,1-<sup>2</sup>H<sub>9</sub>]-butyl)-3,5-(<sup>2</sup>H<sub>1</sub>-2H)-phenol), **D<sub>6</sub>-UV-327-4-mOH** (2-(5-chloro-benzotriazol-2-yl)-4-(1,1-di-(<sup>2</sup>H<sub>3</sub>]-methyl)-2-hydroxyethyl)-6-(tert-butyl)phenol), **D<sub>6</sub>-UV-327-4-mcx** (2-(5-chloro-benzotriazol-2-yl)-4-(1,1-di-(<sup>2</sup>H<sub>3</sub>]-methyl)-1-carboxymethyl)-6-(tert-butyl)phenol), **D<sub>12</sub>-UV-327-4+6-diOH** (2-(5-chloro-benzotriazol-2-yl)-4,6-di-[1,1-di-(<sup>2</sup>H<sub>3</sub>]-methyl)-2-hydroxyethyl]phenol), and **D<sub>6</sub>-UV-327-4mOH-6-mcx** (2-(5-chloro-benzotriazol-2-yl)-6-(1,1-dimethyl-1-carboxymethyl)-4-(1,1-di-(<sup>2</sup>H<sub>3</sub>]-methyl)-2-hydroxyethyl)phenol)

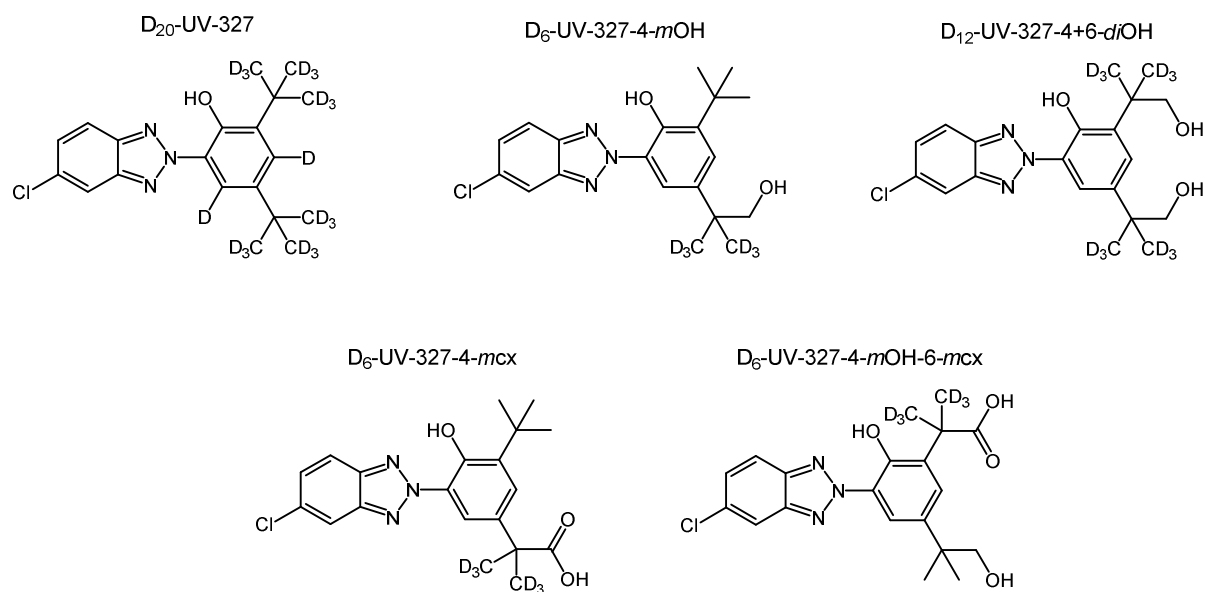

**Fig. SI-2** Effect of the extraction solvent volume (n = 3). Extraction solvent (chloroform), 100–450  $\mu\text{l}$ ; disperser solvent (isopropyl alcohol), 700  $\mu\text{l}$  (From left to right: UV-327, UV-327-6-*m*OH, UV-327-4-*m*OH, UV-327-6-*mcx*, UV-327-4-*mcx*, UV-327-4+6-*di*OH, UV-327-4-*m*OH-6-*mcx*, UV-327-4-*mcx*-6-*m*OH)

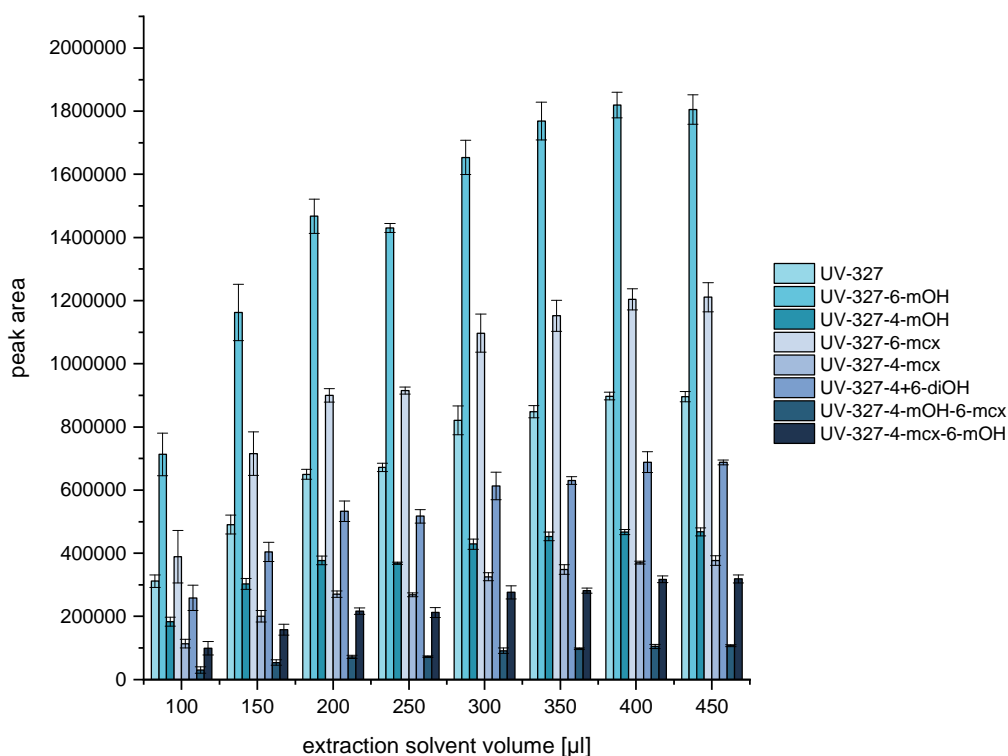

**Fig. SI-3** Effect of the disperser solvent volume (n = 3). Extraction solvent (chloroform), 400  $\mu\text{l}$ ; disperser solvent (isopropyl alcohol), 400–1000  $\mu\text{l}$  (From left to right: UV-327, UV-327-6-*m*OH, UV-327-4-*m*OH, UV-327-6-*mcx*, UV-327-4-*mcx*, UV-327-4+6-*di*OH, UV-327-4-*m*OH-6-*mcx*, UV-327-4-*mcx*-6-*m*OH)

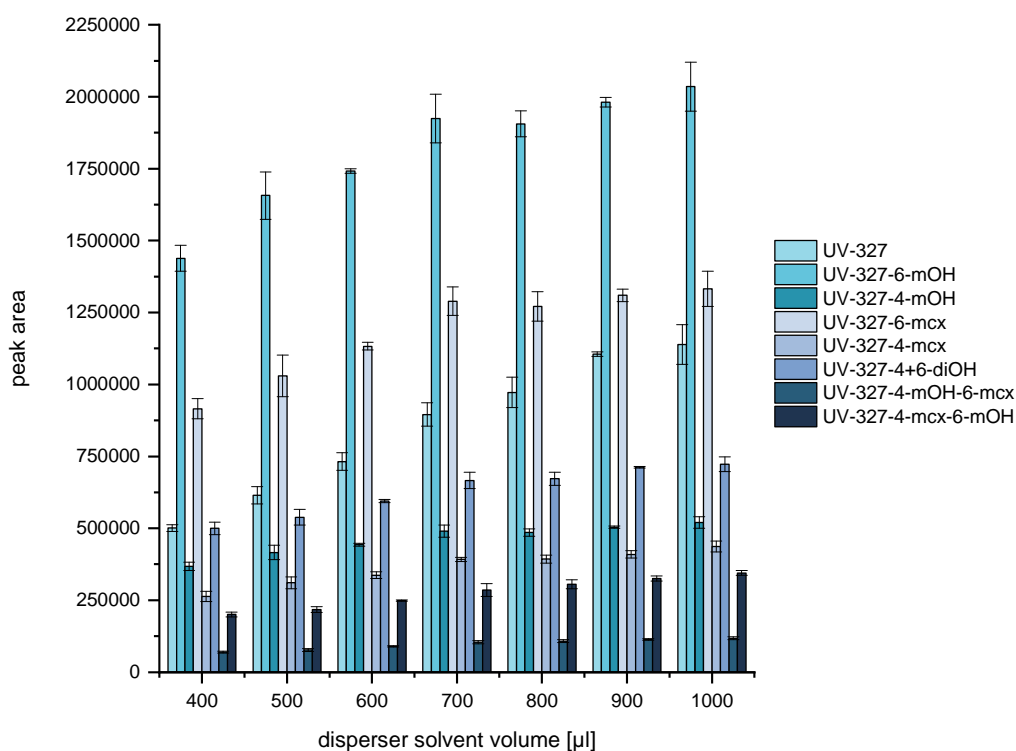

**Fig. SI-4** Effect of the pH value in the range of pH < 2.0 to pH 6.0 (n = 3). Extraction solvent (chloroform), 400  $\mu$ l; disperser solvent (isopropyl alcohol), 700  $\mu$ l (From left to right: UV-327, UV-327-6-*m*OH, UV-327-4-*m*OH, UV-327-6-*mcx*, UV-327-4-*mcx*, UV-327-4+6-*di*OH, UV-327-4-*m*OH-6-*mcx*, UV-327-4-*mcx*-6-*m*OH)

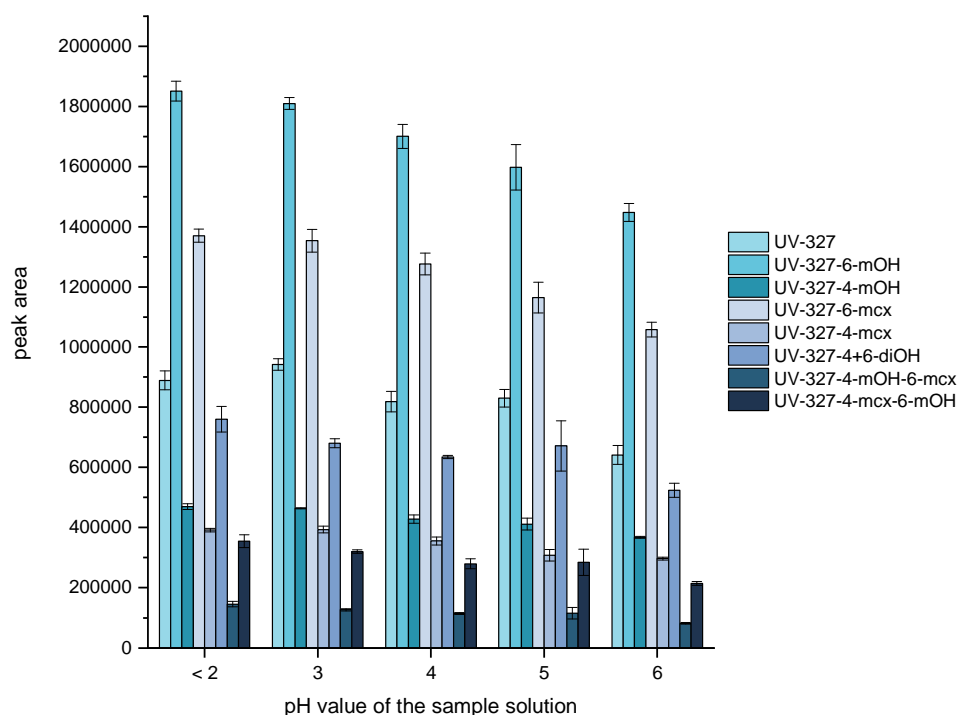

**Fig. SI-5** Effect of the duration of vortex-mixing in the range of 0–180 sec (n = 3). Extraction solvent (chloroform), 400  $\mu$ l; disperser solvent (isopropyl alcohol), 700  $\mu$ l (From left to right: UV-327, UV-327-6-*m*OH, UV-327-4-*m*OH, UV-327-6-*mcx*, UV-327-4-*mcx*, UV-327-4+6-*di*OH, UV-327-4-*m*OH-6-*mcx*, UV-327-4-*mcx*-6-*m*OH)

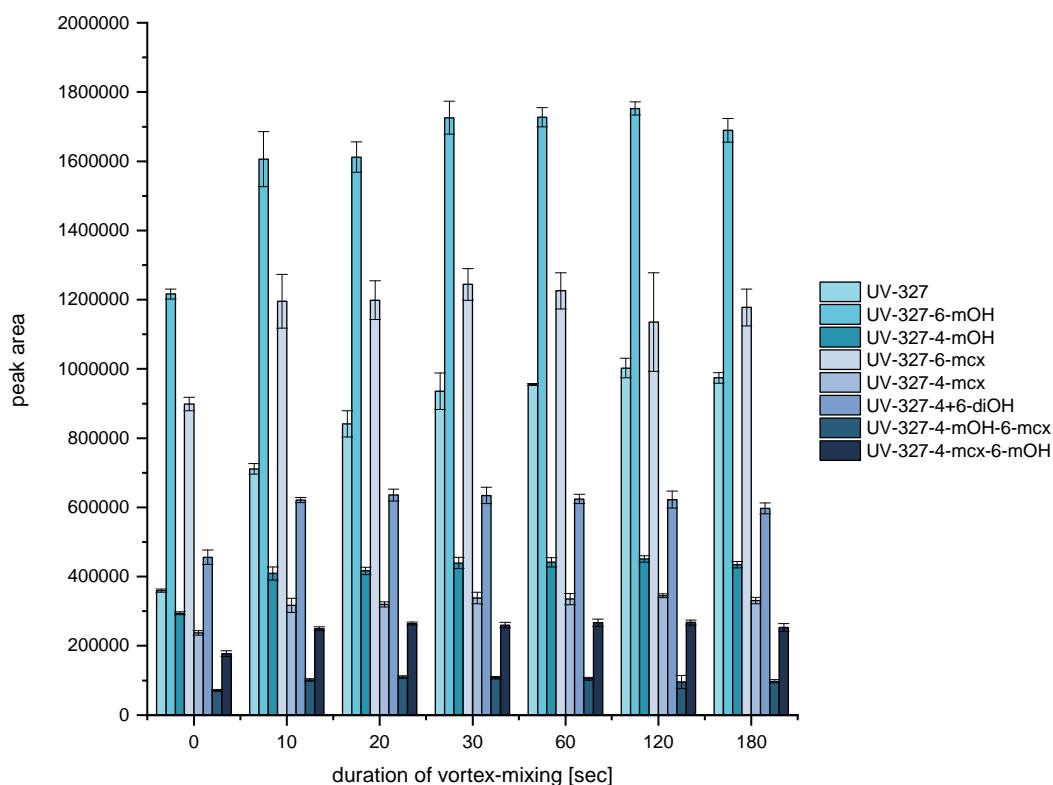

**Fig. SI-6** Effect of salt addition in the range of 0–6% NaCl (v/v) (n = 3). Extraction solvent (chloroform), 400  $\mu$ l; disperser solvent (isopropyl alcohol), 700  $\mu$ l (From left to right: UV-327, UV-327-6-*m*OH, UV-327-4-*m*OH, UV-327-6-*mcx*, UV-327-4-*mcx*, UV-327-4+6-*di*OH, UV-327-4-*m*OH-6-*mcx*, UV-327-4-*mcx*-6-*m*OH)

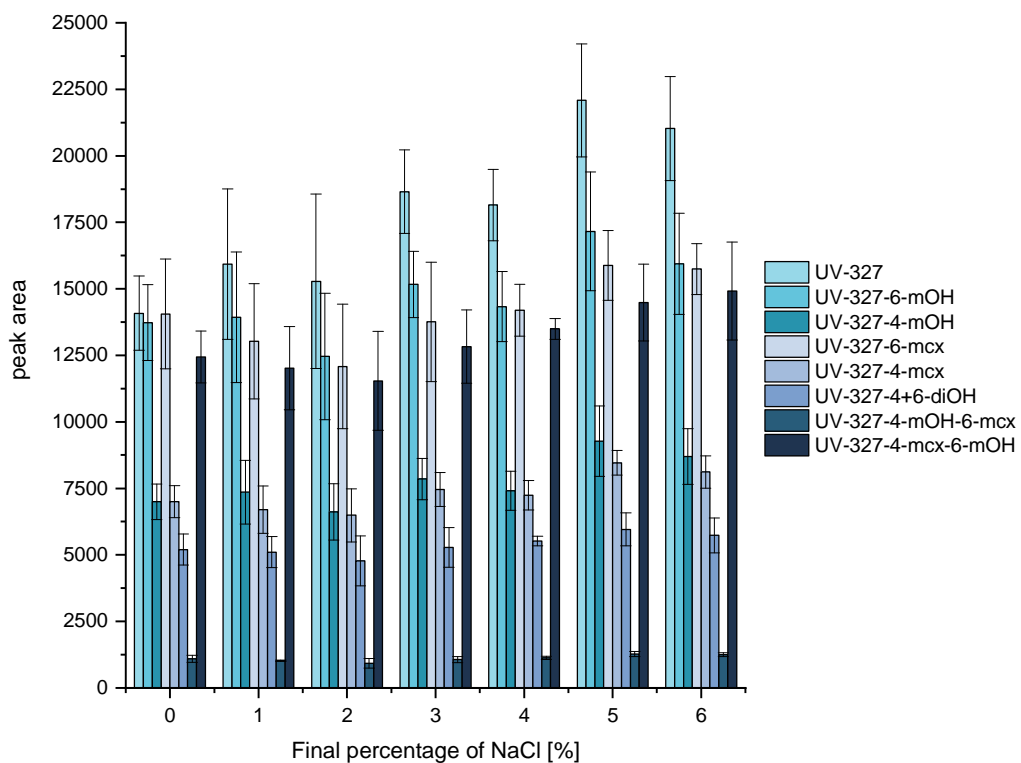

**Fig. SI-7** Calibration curves for the determination of UV-327 and its metabolites in urine (ISTD = internal standard)

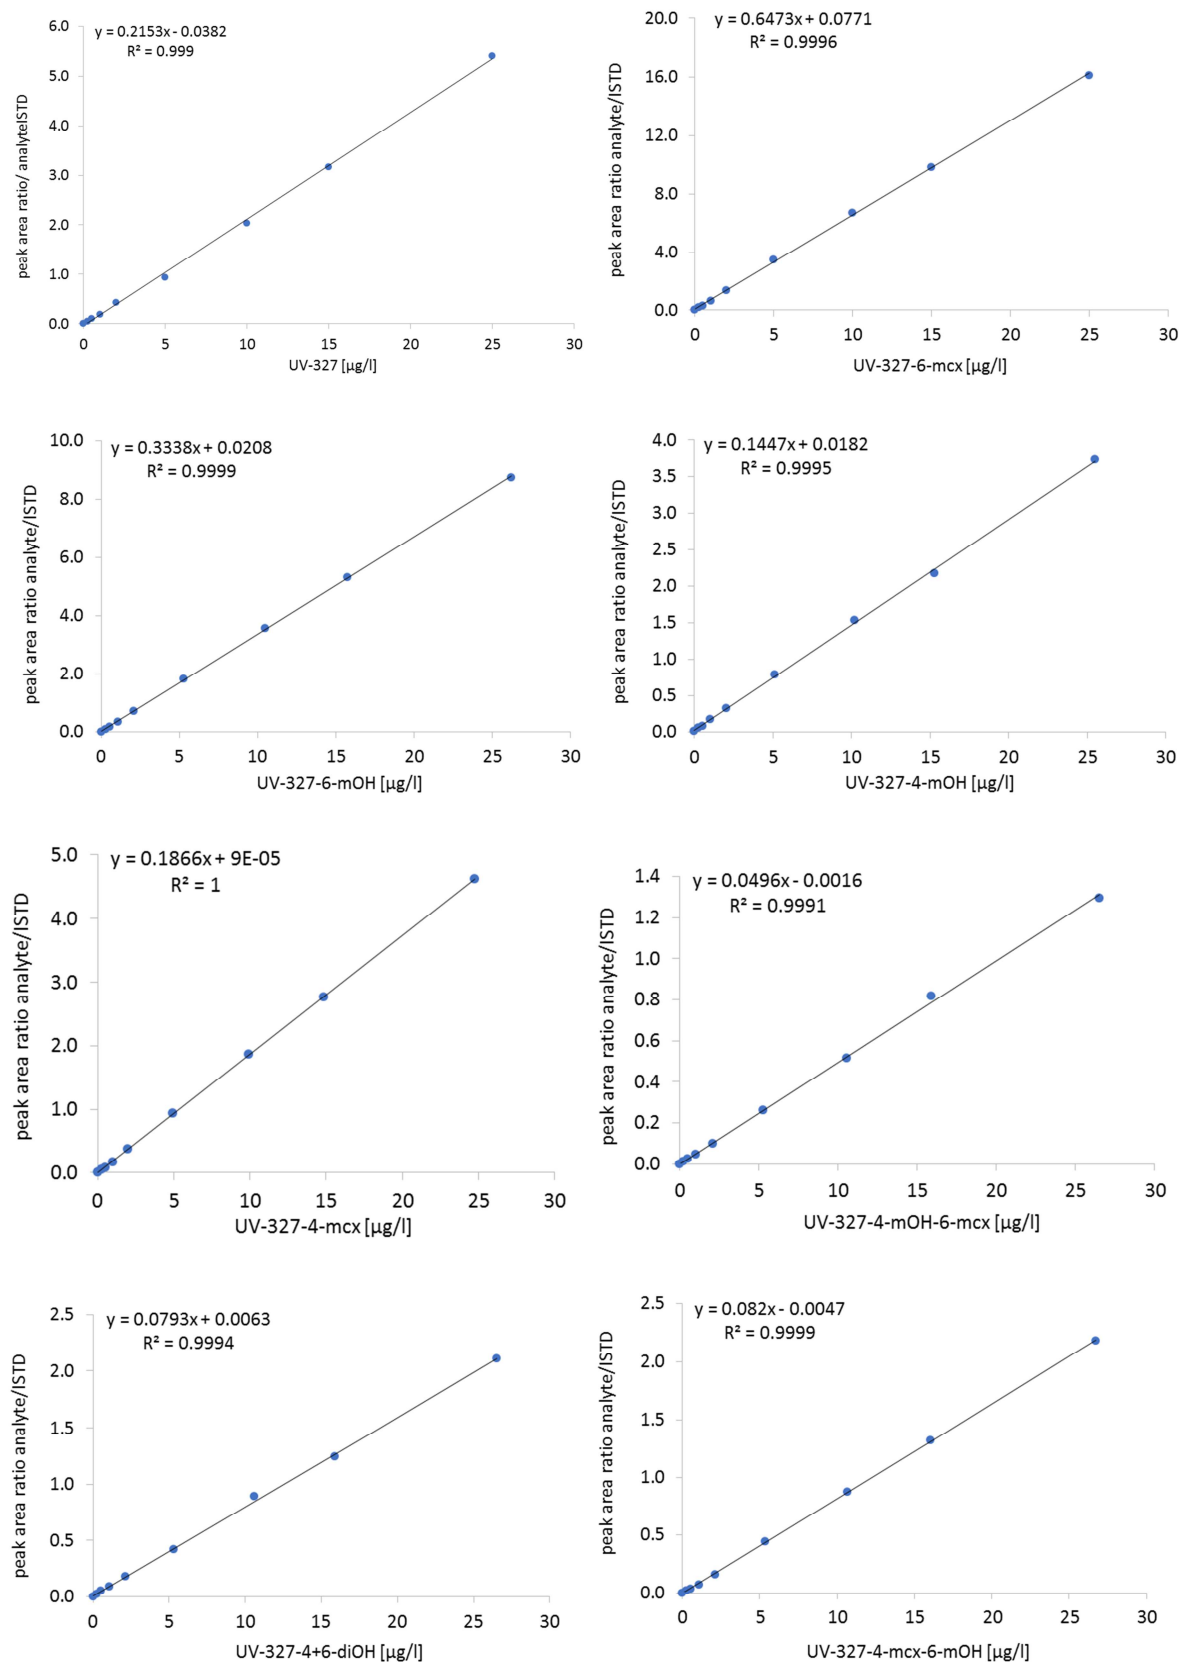

Supplement: d1ay00932j1.pdf [file d1ay00932j1.pdf]
